# Supplementary material
Source: PubMed Central journal article supplement (PMC3001121)

| Supplementary Table S1 - Author Contributions |                                            |                                                                                                                                                                        | Developed BioPAX: |         |         |               |
|-----------------------------------------------|--------------------------------------------|------------------------------------------------------------------------------------------------------------------------------------------------------------------------|-------------------|---------|---------|---------------|
| Author Name                                   | Email                                      | Affiliation                                                                                                                                                            | Level 1           | Level 2 | Level 3 | Data provider |
| Emek Demir                                    | demir@cbio.mskcc.org                       | Computational Biology, Memorial Sloan-Kettering Cancer Center, New York, NY 10065                                                                                      | 1                 | 1       | 1       | 1             |
| Michael P. Cary                               | michael.cary@ucsf.edu                      | Computational Biology, Memorial Sloan-Kettering Cancer Center, New York, NY 10065                                                                                      | 1                 | 1       | 1       | 1             |
| Suzanne Paley                                 | paley@AI.SRI.COM                           | SRI International, 333 Ravenswood Ave., Menlo Park, CA 94025, USA.                                                                                                     | 1                 | 1       | 1       | 1             |
| Ken Fukuda                                    | fukuda-cbrc@aist.go.jp                     | Institute for Bioinformatics Research and Development Japan Science and Technology Agency Tokyo Japan.                                                                 | 1                 | 1       | 1       | 1             |
| Christian Lemer                               | biopax@christian.lemer.be                  | Université libre de Bruxelles, boulevard du Triomphe CP 263, B-1050 Bruxelles, Belgium                                                                                 | 0                 | 1       | 1       | 1             |
| Imre Vastrik                                  | vastrik@ebi.ac.uk                          | European Bioinformatics Institute, Wellcome Trust Genome Campus, Hinxton, Cambridge CB10 1SD, UK                                                                       | 0                 | 1       | 1       | 1             |
| Guanming Wu                                   | guanmingwu@gmail.com                       | Ontario Institute for Cancer Research, Toronto, ON, Canada M5G0A3                                                                                                      | 0                 | 1       | 1       | 1             |
| Peter D'Eustachio                             | Peter.D'Eustachio@nyumc.org                | NYU School of Medicine, New York, NY 10016, USA                                                                                                                        | 0                 | 1       | 1       | 1             |
| Carl F Schaefer                               | schaefec@mail.nih.gov                      | National Cancer Institute, Center for Biomedical Informatics and Information Technology, Rockville MD, USA                                                             | 0                 | 0       | 1       | 1             |
| Frank Schacherer                              | frank.schacherer@biobase-international.com | BIOBASE Corporation                                                                                                                                                    | 0                 | 1       | 1       | 1             |
| Irma Martinez-Flores                          | imartflo@ccg.unam.mx                       | Programa de Genómica Computacional, Centro de Ciencias Genómicas, Universidad Nacional Autónoma de México, Cuernavaca, Morelos, Mexico.                                | 0                 | 0       | 1       | 1             |
| Zhenjun Hu                                    | zjhu@bu.edu                                | Biomolecular Systems Laboratory, Boston University, Boston, MA, USA.                                                                                                   | 0                 | 0       | 1       | 0             |
| Veronica Jimenez-Jacinto                      | vjimenez@ccg.unam.mx                       | Programa de Genómica Computacional, Centro de Ciencias Genómicas, Universidad Nacional Autónoma de México, Cuernavaca, Morelos, Mexico                                 | 0                 | 0       | 1       | 1             |
| Geeta Joshi-Tope                              | geetatope@gmail.com                        | Cold Spring Harbor Laboratory, 1 Bungtown Rd, Cold Spring Harbor, NY 11724                                                                                             | 0                 | 1       | 1       | 1             |
| Kumaran Kandasamy                             | kumaran@jhmi.edu                           | McKusick-Nathans Institute of Genetic Medicine and the Departments of Biological Chemistry, Pathology and Oncology, Johns Hopkins University, Baltimore, MD 21205, USA | 0                 | 0       | 1       | 1             |
| Alejandra C. Lopez-Fuentes                    | aclopez@ccg.unam.mx                        | Programa de Genómica Computacional, Centro de Ciencias Genómicas, Universidad Nacional Autónoma de México, Cuernavaca, Morelos, Mexico                                 | 0                 | 0       | 1       | 1             |
| Joanne Luciano                                | jluciano@gmail.com                         | Predictive Medicine, Belmont, Massachusetts 02478, USA                                                                                                                 | 1                 | 1       | 1       | 0             |
| Huaiyu Mi                                     | huaiyu.mi@sri.com                          | Evolutionary Systems Biology Group, Artificial Intelligence Center, SRI International, Menlo Park, CA 94025, USA                                                       | 0                 | 0       | 1       | 1             |
| Elgar Pichler                                 | elgar.pichler@gmail.com                    |                                                                                                                                                                        | 0                 | 1       | 1       | 0             |
| Igor Rodchenkov                               | rodche@gmail.com                           | Donnelly Center for Cellular and Biomolecular Research, Banting and Best Department of Medical Research, University of Toronto, Toronto, Ontario, Canada               | 0                 | 0       | 1       | 0             |
| Andrea Splendiani                             | Andrea.splendiani@bbsrc.ac.uk              | UPRES-EA 3888-Laboratoire d'Informatique Médicale, Faculté de Médecine, Université Rennes 1, Rennes FR-35043, France.                                                  | 0                 | 1       | 1       | 0             |
| Sasha Tkachev                                 | stkachev@cellsignal.com                    | Cell Signaling Technology, Inc. Danvers, MA, USA.                                                                                                                      | 0                 | 0       | 1       | 1             |
| Jeremy Zucker                                 | zucker@broadinstitute.org                  | Broad Institute                                                                                                                                                        | 1                 | 1       | 1       | 0             |
| Gopal Gopinath                                | gopal.gopinathrao@fda.hhs.gov              | Center for Food Safety and Applied Nutrition, US Food and Drug Administration, 8301 Muirkirk Road, Laurel, Maryland, 20708, USA                                        | 0                 | 0       | 1       | 1             |
| Harsha Rajasimha                              | hrajasm@vt.edu                             | Virginia Bioinformatics Institute, Virginia Polytechnic Institute and State University, Blacksburg, VA 24061, USA.                                                     | 0                 | 1       | 1       | 0             |
| Ranjani Ramakrishnan                          | ramakris@ohsu.edu                          | Division of Neuroscience. Oregon Health & Science University, Portland, OR 97239-3098, USA                                                                             | 0                 | 0       | 1       | 0             |
| Imran Shah                                    | shah.imran@epa.gov                         | U.S. Environmental Protection Agency Durham, NC USA.                                                                                                                   | 1                 | 0       | 0       | 0             |
| Mustafa Syed                                  | biocompman@yahoo.com                       | Mathematics & Computer Science Division, Argonne National Laboratory, 9700 South Cass Avenue, Argonne, IL 60439, USA                                                   | 1                 | 0       | 0       | 1             |
| Nadia Anwar                                   | anwar@cbio.mskcc.org                       | Computational Biology, Memorial Sloan-Kettering Cancer Center, New York, NY 10065                                                                                      | 0                 | 0       | 1       | 0             |
| Ozgun Babur                                   | ozgun@cbio.mskcc.org                       | Computational Biology, Memorial Sloan-Kettering Cancer Center, New York, NY 10065                                                                                      | 0                 | 0       | 1       | 0             |
| Michael Blinov                                | blinov@uchc.edu                            | University of Connecticut Health Center, Farmington, CT, USA.                                                                                                          | 0                 | 0       | 1       | 0             |

| Supplementary Table S1 - Author Contributions |                                      |                                                                                                                                                                            | Developed BioPAX: |   |   |   |
|-----------------------------------------------|--------------------------------------|----------------------------------------------------------------------------------------------------------------------------------------------------------------------------|-------------------|---|---|---|
| Erik Brauner                                  | erik_brauner@yahoo.com               | Department of Biological Chemistry and Molecular Pharmacology, Harvard Medical School, 250 Longwood Avenue, SGMB-322, Boston, Massachusetts 02115                          | 1                 | 0 | 0 | 0 |
| Dan Corwin                                    | dan@lexikos.com                      | Lexikos Corporation, USA                                                                                                                                                   | 0                 | 1 | 1 | 0 |
| Sylva Donaldson                               | sylva.donaldson@utoronto.ca          | Donnelly Center for Cellular and Biomolecular Research, Banting and Best Department of Medical Research, University of Toronto, Toronto, Ontario, Canada                   | 0                 | 0 | 1 | 0 |
| Frank Gibbons                                 | fdgibbons@gmail.com                  | Department of Biological Chemistry and Molecular Pharmacology, Harvard Medical School, Longwood Avenue, Boston, Massachusetts 02115, USA                                   | 0                 | 1 | 0 | 0 |
| Robert Goldberg                               | robert.goldberg@nist.gov             | Biotechnology Division, National Institute of Standards and Technology, Gaithersburg, MD 20899, USA.                                                                       | 1                 | 0 | 0 | 0 |
| Peter Hornbeck                                | phornbeck@cellsignal.com             | Cell Signaling Technology, 3 Trask Lane, Danvers, Massachusetts 01923, USA                                                                                                 | 0                 | 0 | 1 | 1 |
| Augustin Luna                                 | augustin@mail.nih.gov                | National Cancer Institute, National Institute of Health, Washington DC USA.                                                                                                | 0                 | 0 | 1 | 0 |
| Peter Murray-Rust                             | pm286@cam.ac.uk                      | Unilever Centre for Molecular Sciences Informatics, Department of Chemistry, University of Cambridge, Cambridge CB2 1EW, UK                                                | 1                 | 0 | 0 | 0 |
| Eric Neumann                                  | eneumann@alum.mit.edu                | Clinical Semantics Group, Lexington, MA 02420, USA                                                                                                                         | 1                 | 1 | 0 | 0 |
| Oliver Reubenacker                            | curoli@gmail.com                     | Center for Cell Analysis and Modeling, University of Connecticut Health Center, Storrs, CT, USA.                                                                           | 0                 | 0 | 1 | 0 |
| Matthias Samwald                              | samwald@gmx.at                       | Digital Enterprise Research Institute, National University of Ireland, Galway, Ireland // Konrad Lorenz Institute for Evolution and Cognition Research, Altenberg, Austria | 0                 | 0 | 1 | 0 |
| Martijn van Iersel                            | martijn.vaniersel@bigcat.unimaas.nl  | University Maastricht                                                                                                                                                      | 0                 | 0 | 1 | 1 |
| Sarala Wimalaratne                            | sarala.dissanayake@auckland.ac.nz    | University of Auckland                                                                                                                                                     | 0                 | 0 | 1 | 0 |
| Keith Allen                                   | keith.allen@syngenta.com             | Syngenta Biotech Inc., Research Triangle Park, North Carolina, USA.                                                                                                        | 0                 | 0 | 1 | 0 |
| Burk Braun                                    | burk.braun@biobase-international.com | BIOBASE Corporation                                                                                                                                                        | 0                 | 0 | 1 | 0 |
| Michelle Whirl-Carrillo                       | mwccarrillo@stanford.edu             | PharmGKB, Department of Genetics, Stanford University, Stanford, California 94305-5120, USA.                                                                               | 0                 | 0 | 1 | 0 |
| Kam Dahlquist                                 | kdahlquist@lmu.edu                   | Loyola Marymount University, 1 LMU Drive, MS 8220, Los Angeles, CA 90045-2659                                                                                              | 0                 | 1 | 0 | 0 |
| Andrew Finney                                 | afinney@caltech.edu                  | Physiomics PLC, Magdalen Centre, Oxford Science Park, Oxford, OX4 4GA, UK                                                                                                  | 1                 | 0 | 0 | 0 |
| Marc Gillespie                                | gillespm@stjohns.edu                 | St. John's University, Queens NY 11439 USA                                                                                                                                 | 0                 | 0 | 1 | 0 |
| Elizabeth Glass                               | marland@mcs.anl.gov                  | Mathematics & Computer Science Division, Argonne National Laboratory, 9700 South Cass Avenue, Argonne, IL 60439, USA                                                       | 1                 | 0 | 0 | 0 |
| Li Gong                                       | lgong@stanford.edu                   | Department of Genetics, Stanford University, Stanford, California 94305-5120, USA.                                                                                         | 0                 | 0 | 1 | 0 |
| Robin Haw                                     | Robin.Haw@oicr.on.ca                 | The Ontario Institute for Cancer Research                                                                                                                                  | 0                 | 0 | 1 | 1 |
| Michael Honig                                 | mhonig@c2b2.columbia.edu             | Columbia University                                                                                                                                                        | 0                 | 0 | 1 | 0 |
| Olivier Hubaut                                | olivier@hubaut.info                  | Université libre de Bruxelles, boulevard du Triomphe CP 263, B-1050 Bruxelles, Belgium                                                                                     | 0                 | 0 | 1 | 0 |
| David Kane                                    | David_Kane@sra.com                   | SRA International, USA                                                                                                                                                     | 0                 | 1 | 0 | 0 |
| Shiva Krupa                                   | Shiva.Krupa@Novartis.com             | Novartis Knowledge Center, Cambridge MA, USA                                                                                                                               | 0                 | 0 | 1 | 0 |
| Martina Kutmon                                | tina.kutmon@gmail.com                | University of Ottawa                                                                                                                                                       | 0                 | 0 | 1 | 0 |
| Julie Leonard                                 | Julie.Leonard@SYNGENTA.COM           | Syngenta Biotech Inc., Research Triangle Park, North Carolina, USA.                                                                                                        | 0                 | 0 | 0 | 0 |
| Debbie Marks                                  | deboramarks@gmail.com                | Department of Systems Biology, Harvard Medical School, Boston, MA, USA                                                                                                     | 1                 | 0 | 0 | 0 |
| David Merberg                                 | david_merberg@vrtx.com               | Vertex Pharmaceuticals 130 Waverly Street Cambridge, MA 02139                                                                                                              | 0                 | 0 | 1 | 0 |
| Victoria Petri                                | VPetri@hmgc.mcw.edu                  | Human and Molecular Genetics Center, Medical College of Wisconsin, Milwaukee, WI, USA                                                                                      | 0                 | 0 | 1 | 0 |
| Alex Pico                                     | apico@gladstone.ucsf.edu             | Gladstone Institute of Cardiovascular Disease, 1650 Owens Street, San Francisco, CA 94158, USA                                                                             | 0                 | 0 | 1 | 1 |
| Dean Ravenscroft                              | Dean.Ravenscroft@gmail.com           | Department of Plant Breeding and Genetics, 240 Emerson Hall, Cornell University, Ithaca, NY 14853, USA                                                                     | 0                 | 0 | 1 | 0 |
| Liya Ren                                      | ren@cshl.edu                         | Cold Spring Harbor Laboratory, 1 Bungtown Rd, Cold Spring Harbor, NY 11724                                                                                                 | 0                 | 0 | 1 | 0 |

| Supplementary Table S1 - Author Contributions |                                              |                                                                                                                                                                                                                                                                                                                                   | Developed BioPAX: |   |   |   |
|-----------------------------------------------|----------------------------------------------|-----------------------------------------------------------------------------------------------------------------------------------------------------------------------------------------------------------------------------------------------------------------------------------------------------------------------------------|-------------------|---|---|---|
| Nigam Shah                                    | nigam@stanford.edu                           | Centre for Biomedical Informatics, School of Medicine, Stanford University, Stanford, CA 94305, USA                                                                                                                                                                                                                               | 0                 | 0 | 1 | 0 |
| Margot Sunshine                               | margots@mail.nih.gov                         | National Cancer Institute, National Institute of Health, Washington DC USA.                                                                                                                                                                                                                                                       | 0                 | 0 | 1 | 1 |
| Rebecca Tang                                  | rebecca.tang@stanford.edu                    | Department of Genetics, Stanford University Medical Center, Stanford, CA, USA.                                                                                                                                                                                                                                                    | 0                 | 0 | 1 | 1 |
| Ryan Whaley                                   | ryan.whaley@stanford.edu                     | Department of Genetics, Stanford University, Stanford, California 94305-5120, USA.                                                                                                                                                                                                                                                | 0                 | 0 | 1 | 0 |
| Stan Letovsky                                 | letovsky@bu.edu                              | Computational Sciences, Informatics, Millennium Pharmaceuticals Inc., Cambridge, Massachusetts 02139, USA                                                                                                                                                                                                                         | 1                 | 0 | 0 | 0 |
| Kenneth H. Buetow                             | buetowke@mail.nih.gov                        | Center for Biomedical Informatics and Information Technology, Neuro-Oncology Branch, National Cancer Institute, Bethesda, MD 20892, USA.                                                                                                                                                                                          | 0                 | 0 | 1 | 1 |
| Andrey Rzhetsky                               | arzhetsk@medicine.bsd.uchicago.edu           | Institute for Genomics and Systems Biology, The University of Chicago and Arqonne National Laboratory, Chicago, IL 60637, USA                                                                                                                                                                                                     | 1                 | 1 | 0 | 0 |
| Vincent Schachter                             | vincent.schachter@total.com                  | Total Gas & Power                                                                                                                                                                                                                                                                                                                 | 1                 | 0 | 0 | 0 |
| Bruno S. Sobral                               | sobral@vt.edu                                | Virginia Bioinformatics Institute at Virginia Tech, Blacksburg, VA, USA                                                                                                                                                                                                                                                           | 0                 | 1 | 1 | 0 |
| Ugur Dogrusoz                                 | ugur@cs.bilkent.edu.tr                       | Center for Bioinformatics and Computer Engineering Department, Bilkent University, Ankara, Turkey                                                                                                                                                                                                                                 | 1                 | 1 | 0 | 1 |
| Shannon McWeeney                              | mcweeney@ohsu.edu                            | Department of Behavioral Neuroscience. Oregon Health & Science University, Portland, OR 97239-3098, USA                                                                                                                                                                                                                           | 0                 | 0 | 1 | 1 |
| Mirit Aladjem                                 | aladjemm@mail.nih.gov                        | Laboratory of Molecular Pharmacology, Center for Cancer Research, NCI, NIH, Bethesda, MD 20892-4255, USA.                                                                                                                                                                                                                         | 0                 | 1 | 1 | 0 |
| Ewan Birney                                   | birney@ebi.ac.uk                             | European Bioinformatics Institute, Wellcome Trust Genome Campus, Hinxton, Cambridge CB10 1SD, UK                                                                                                                                                                                                                                  | 0                 | 1 | 1 | 1 |
| Julio Collado-Vides                           | collado@ccg.unam.mx                          | Programa de Genómica Computacional, Centro de Ciencias Genómicas, Universidad Nacional Autónoma de México, Cuernavaca, Morelos, Mexico                                                                                                                                                                                            | 0                 | 0 | 1 | 1 |
| Susumu Goto                                   | goto@kuicr.kyoto-u.ac.jp                     | Bioinformatics Center, Institute for Chemical Research, Kyoto University, Uji, Kyoto 611-0011, Japan                                                                                                                                                                                                                              | 1                 | 0 | 0 | 1 |
| Michael Hucka                                 | mhucka@caltech.edu                           | Biological Network Modeling Center, California Institute of Technology, Pasadena, CA, USA.                                                                                                                                                                                                                                        | 1                 | 1 | 1 | 0 |
| Nicolas Le Novère                             | lenov@ebi.ac.uk                              | European Bioinformatics Institute, Wellcome Trust Genome Campus, Hinxton, Cambridge CB10 1SD, UK                                                                                                                                                                                                                                  | 0                 | 0 | 1 | 1 |
| Natalia Maltsev                               | maltsev@mcs.anl.gov                          | Mathematics & Computer Science Division, Argonne National Laboratory, 9700 South Cass Avenue, Argonne, IL 60439, USA                                                                                                                                                                                                              | 1                 | 0 | 0 | 1 |
| Akhilesh Pandey                               | pandey@jhmi.edu                              | McKusick-Nathans Institute of Genetic Medicine and Department of Biological Chemistry, Johns Hopkins University School of Medicine, 733N Broadway, Broadway Research Building 560, Baltimore, MD 21205, United States, Department of Oncology and Pathology, Johns Hopkins University School of Medicine, 733N Broadway, Broadway | 0                 | 0 | 0 | 1 |
| Paul Thomas                                   | paul.thomas@sri.com                          | Evolutionary Systems Biology Group, Artificial Intelligence Center, SRI International, Menlo Park, CA 94025, USA                                                                                                                                                                                                                  | 0                 | 0 | 1 | 1 |
| Edgar Wingender                               | edgar.wingender@bioinf.med.uni-goettingen.de | Department of Bioinformatics, Goldschmidtstr. 1, D-37077 Göttingen, Germany.                                                                                                                                                                                                                                                      | 0                 | 1 | 1 | 1 |
| Peter D. Karp                                 | pkarp@AI.SRI.COM                             | SRI International, 333 Ravenswood Ave., Menlo Park, CA 94025, USA.                                                                                                                                                                                                                                                                | 1                 | 1 | 1 | 1 |
| Chris Sander                                  | sanderc@mskcc.org                            | Computational Biology Center, Memorial Sloan-Kettering Cancer Center, New York, NY 10065                                                                                                                                                                                                                                          | 1                 | 1 | 1 | 1 |
| Gary D. Bader                                 | gary.bader@utoronto.ca                       | Donnelly Center for Cellular and Biomolecular Research, Banting and Best Department of Medical Research, University of Toronto, Toronto, Ontario, Canada                                                                                                                                                                          | 1                 | 1 | 1 | 1 |

Supplementary Table S2. An example BioPAX file describing the phosphorylation and activation of CHK2 by ATM in human. Data was originally obtained from the Reactome database<sup>8</sup>.

```
<?xml version="1.0"?>
<rdf:RDF
  xmlns="http://www.biopax.org/examples/myExample#"
  xmlns:bp="http://www.biopax.org/release/biopax-level3.owl#"
  xmlns:rdf="http://www.w3.org/1999/02/22-rdf-syntax-ns#"
  xmlns:xsd="http://www.w3.org/2001/XMLSchema#"
  xmlns:rdfs="http://www.w3.org/2000/01/rdf-schema#"
  xmlns:owl="http://www.w3.org/2002/07/owl#"
  xml:base="http://www.biopax.org/examples/myExample">
  <owl:Ontology rdf:about="">
    <owl:imports rdf:resource="http://www.biopax.org/release/biopax-level3.owl"/>
  </owl:Ontology>
  <rdf:Property rdf:about="http://www.biopax.org/release/biopax-
level3.owl#direction"/>
  <bp:Protein rdf:ID="Protein_5">
    <bp:dataSource>
      <bp:Provenance rdf:ID="Provenance_3">
        <bp:displayName rdf:datatype="http://www.w3.org/2001/XMLSchema#string"
          >Reactome (http://reactome.org)</bp:displayName>
        <bp:xref>
          <bp:PublicationXref rdf:ID="pubmed">
            <bp:year rdf:datatype="http://www.w3.org/2001/XMLSchema#int"
              >2003</bp:year>
            <bp:db rdf:datatype="http://www.w3.org/2001/XMLSchema#string"
              >pubmed</bp:db>
            <bp:title rdf:datatype="http://www.w3.org/2001/XMLSchema#string"
              >The Genome Knowledgebase: a resource for biologists and
bioinformaticists.</bp:title>
            <bp:id rdf:datatype="http://www.w3.org/2001/XMLSchema#string"
              >15338623</bp:id>
          </bp:PublicationXref>
        </bp:xref>
      </bp:Provenance>
    </bp:dataSource>
    <bp:cellularLocation>
      <bp:CellularLocationVocabulary rdf:ID="cellularLocationVocabulary_6">
        <bp:term rdf:datatype="http://www.w3.org/2001/XMLSchema#string"
          >nucleoplasm</bp:term>
        <bp:xref>
          <bp:UnificationXref rdf:ID="UnificationXref_7">
            <bp:db rdf:datatype="http://www.w3.org/2001/XMLSchema#string"
              >GENE ONTOLOGY</bp:db>
            <bp:id rdf:datatype="http://www.w3.org/2001/XMLSchema#string"
              >GO:0005654</bp:id>
          </bp:UnificationXref>
        </bp:xref>
      </bp:CellularLocationVocabulary>
    </bp:cellularLocation>
    <bp:entityReference>
      <bp:ProteinReference rdf:ID="CHK2">
        <bp:organism>
          <bp:BioSource rdf:ID="Homo_sapiens">
            <bp:taxonXref>
              <bp:UnificationXref rdf:ID="UnificationXref_10">
                <bp:db rdf:datatype="http://www.w3.org/2001/XMLSchema#string"
                  >taxonomy</bp:db>
                <bp:id rdf:datatype="http://www.w3.org/2001/XMLSchema#string"
                  >9606</bp:id>
              </bp:UnificationXref>
            </bp:taxonXref>
            <bp:standardName rdf:datatype="http://www.w3.org/2001/XMLSchema#string"
              >Homo sapiens</bp:standardName>
            <bp:displayName rdf:datatype="http://www.w3.org/2001/XMLSchema#string"
              >Human</bp:displayName>
          </bp:BioSource>
        </bp:organism>
      </bp:ProteinReference>
    </bp:entityReference>
  </bp:Protein>

```

```

</bp:organism>
<bp:standardName rdf:datatype="http://www.w3.org/2001/XMLSchema#string"
>Serine/threonine-protein kinase Chk2 (Cds1)</bp:standardName>
<bp:xref>
  <bp:RelationshipXref rdf:ID="RelationshipXref_1">
    <bp:relationshipType>
      <bp:RelationshipTypeVocabulary rdf:ID="RelationshipTypeVocabulary_6">
        <bp:comment rdf:datatype="http://www.w3.org/2001/XMLSchema#string"
        >EC Number</bp:comment>
        <bp:term rdf:datatype="http://www.w3.org/2001/XMLSchema#string"
        >see-also</bp:term>
      </bp:RelationshipTypeVocabulary>
    </bp:relationshipType>
    <bp:db rdf:datatype="http://www.w3.org/2001/XMLSchema#string"
    >IUBMB</bp:db>
    <bp:id rdf:datatype="http://www.w3.org/2001/XMLSchema#string"
    >EC 2.7.1.37</bp:id>
  </bp:RelationshipXref>
</bp:xref>
<bp:xref>
  <bp:UnificationXref rdf:ID="UnificationXref_12">
    <bp:id rdf:datatype="http://www.w3.org/2001/XMLSchema#string"
    >O96017</bp:id>
    <bp:db rdf:datatype="http://www.w3.org/2001/XMLSchema#string"
    >uniprot</bp:db>
  </bp:UnificationXref>
</bp:xref>
<bp:displayName rdf:datatype="http://www.w3.org/2001/XMLSchema#string"
>CHK2</bp:displayName>
<bp:name rdf:datatype="http://www.w3.org/2001/XMLSchema#string"
>CHEK2</bp:name>
</bp:ProteinReference>
</bp:entityReference>
<bp:standardName rdf:datatype="http://www.w3.org/2001/XMLSchema#string"
>Serine/threonine-protein kinase Chk2 (Cds1)</bp:standardName>
<bp:name rdf:datatype="http://www.w3.org/2001/XMLSchema#string"
>CHK2</bp:name>
<bp:xref rdf:resource="#UnificationXref_12"/>
<bp:displayName rdf:datatype="http://www.w3.org/2001/XMLSchema#string"
>CHK2</bp:displayName>
</bp:Protein>
<bp:PublicationXref rdf:ID="PublicationXref_24">
  <bp:db rdf:datatype="http://www.w3.org/2001/XMLSchema#string"
  >pubmed</bp:db>
  <bp:source rdf:datatype="http://www.w3.org/2001/XMLSchema#string"
  >EMBO J 22:2860-71 </bp:source>
  <bp:author rdf:datatype="http://www.w3.org/2001/XMLSchema#string"
  >Foray, N </bp:author>
  <bp:author rdf:datatype="http://www.w3.org/2001/XMLSchema#string"
  >Jeggio, P </bp:author>
  <bp:id rdf:datatype="http://www.w3.org/2001/XMLSchema#string"
  >12773400</bp:id>
  <bp:author rdf:datatype="http://www.w3.org/2001/XMLSchema#string"
  >Perricaudet, M </bp:author>
  <bp:author rdf:datatype="http://www.w3.org/2001/XMLSchema#string"
  >Gabriel, A </bp:author>
  <bp:author rdf:datatype="http://www.w3.org/2001/XMLSchema#string"
  >Ashworth, A </bp:author>
  <bp:author rdf:datatype="http://www.w3.org/2001/XMLSchema#string"
  >Randrianarison, V </bp:author>
  <bp:title rdf:datatype="http://www.w3.org/2001/XMLSchema#string"
  >A subset of ATM- and ATR-dependent phosphorylation events requires the BRCA1
  protein.</bp:title>
  <bp:author rdf:datatype="http://www.w3.org/2001/XMLSchema#string"
  >Carr, AM </bp:author>
  <bp:author rdf:datatype="http://www.w3.org/2001/XMLSchema#string"
  >Marot, D</bp:author>
  <bp:year rdf:datatype="http://www.w3.org/2001/XMLSchema#int"
  >2003</bp:year>
</bp:PublicationXref>
<bp:SequenceSite rdf:ID="SequenceSite_20">
  <bp:positionStatus rdf:datatype="http://www.w3.org/2001/XMLSchema#string"

```

```

>EQUAL</bp:positionStatus>
<bp:sequencePosition rdf:datatype="http://www.w3.org/2001/XMLSchema#int"
>1981</bp:sequencePosition>
</bp:SequenceSite>
<bp:SmallMolecule rdf:ID="SmallMolecule_21">
<bp:standardName rdf:datatype="http://www.w3.org/2001/XMLSchema#string"
>Adenosine 5'-diphosphate</bp:standardName>
<bp:cellularLocation rdf:resource="#CellularLocationVocabulary_6"/>
<bp:dataSource rdf:resource="#Provenance_3"/>
<bp:xref>
<bp:UnificationXref rdf:ID="UnificationXref_22">
<bp:id rdf:datatype="http://www.w3.org/2001/XMLSchema#string"
>CHEBI:2342</bp:id>
<bp:db rdf:datatype="http://www.w3.org/2001/XMLSchema#string"
>ChEBI</bp:db>
</bp:UnificationXref>
</bp:xref>
<bp:entityReference>
<bp:SmallMoleculeReference rdf:ID="SmallMoleculeReference_23">
<bp:xref rdf:resource="#UnificationXref_22"/>
<bp:displayName rdf:datatype="http://www.w3.org/2001/XMLSchema#string"
>ADP</bp:displayName>
<bp:standardName rdf:datatype="http://www.w3.org/2001/XMLSchema#string"
>Adenosine 5'-diphosphate</bp:standardName>
</bp:SmallMoleculeReference>
</bp:entityReference>
<bp:displayName rdf:datatype="http://www.w3.org/2001/XMLSchema#string"
>ADP</bp:displayName>
</bp:SmallMolecule>
<bp:ProteinReference rdf:ID="ATM">
<bp:name rdf:datatype="http://www.w3.org/2001/XMLSchema#string"
>Ataxia telangiectasia mutated) (A-T, mutated) </bp:name>
<bp:displayName rdf:datatype="http://www.w3.org/2001/XMLSchema#string"
>ATM</bp:displayName>
<bp:standardName rdf:datatype="http://www.w3.org/2001/XMLSchema#string"
>Serine-protein kinase ATM (Ataxia telangiectasia mutated) (A-T,
mutated)</bp:standardName>
<bp:xref rdf:resource="#Relationshipxref_1"/>
<bp:xref>
<bp:UnificationXref rdf:ID="UnificationXref_28">
<bp:id rdf:datatype="http://www.w3.org/2001/XMLSchema#string"
>Q13315</bp:id>
<bp:db rdf:datatype="http://www.w3.org/2001/XMLSchema#string"
>uniprot</bp:db>
</bp:UnificationXref>
</bp:xref>
<bp:organism rdf:resource="#Homo_sapiens"/>
</bp:ProteinReference>
<bp:RelationshipXref rdf:ID="RelationshipXref_29">
<bp:id rdf:datatype="http://www.w3.org/2001/XMLSchema#string"
>GO:0016301</bp:id>
<bp:db rdf:datatype="http://www.w3.org/2001/XMLSchema#string"
>GENE ONTOLOGY</bp:db>
<bp:relationshipType>
<bp:RelationshipTypeVocabulary rdf:ID="GO_molecular_function">
<bp:term rdf:datatype="http://www.w3.org/2001/XMLSchema#string"
>gene ontology term for cellular function</bp:term>
<bp:xref>
<bp:UnificationXref rdf:ID="UnificationXref_5">
<bp:db rdf:datatype="http://www.w3.org/2001/XMLSchema#string"
>PSI-MI</bp:db>
<bp:id rdf:datatype="http://www.w3.org/2001/XMLSchema#string"
>MI:0355</bp:id>
</bp:UnificationXref>
</bp:xref>
</bp:RelationshipTypeVocabulary>
</bp:relationshipType>
</bp:RelationshipXref>
<bp:Catalysis rdf:ID="Catalysis_1">
<bp:dataSource rdf:resource="#Provenance_3"/>
<bp:controlled>
<bp:BiochemicalReaction rdf:ID="BiochemicalReaction_2">

```

```

<bp:right>
  <bp:Protein rdf:ID="Protein_16">
    <bp:entityReference rdf:resource="#CHK2"/>
    <bp:name rdf:datatype="http://www.w3.org/2001/XMLSchema#string"
    >CHK2</bp:name>
    <bp:xref rdf:resource="#UnificationXref_12"/>
    <bp:feature>
      <bp:ModificationFeature rdf:ID="ModificationFeature_17">
        <bp:featureLocation rdf:resource="#SequenceSite_20"/>
        <bp:modificationType>
          <bp:SequenceModificationVocabulary
rdf:ID="SequenceModificationVocabulary_18">
            <bp:xref>
              <bp:UnificationXref rdf:ID="UnificationXref_19">
                <bp:db rdf:datatype="http://www.w3.org/2001/XMLSchema#string"
                >PSI-MI</bp:db>
                <bp:id rdf:datatype="http://www.w3.org/2001/XMLSchema#string"
                >MI:0176</bp:id>
              </bp:UnificationXref>
            </bp:xref>
            <bp:term rdf:datatype="http://www.w3.org/2001/XMLSchema#string"
            >o-phospho-serine</bp:term>
          </bp:SequenceModificationVocabulary>
        </bp:modificationType>
      </bp:ModificationFeature>
    </bp:feature>
    <bp:standardName rdf:datatype="http://www.w3.org/2001/XMLSchema#string"
    >Serine/threonine-protein kinase chk2 (Cds1)</bp:standardName>
    <bp:dataSource rdf:resource="#Provenance_3"/>
    <bp:displayName rdf:datatype="http://www.w3.org/2001/XMLSchema#string"
    >CHK2</bp:displayName>
    <bp:cellularLocation rdf:resource="#CellularLocationVocabulary_6"/>
  </bp:Protein>
</bp:right>
<bp:xref rdf:resource="#PublicationXref_24"/>
<bp:right rdf:resource="#SmallMolecule_21"/>
<bp:participantStoichiometry>
  <bp:Stoichiometry rdf:ID="Stoichiometry_2">
    <bp:stoichiometricCoefficient
rdf:datatype="http://www.w3.org/2001/XMLSchema#float"
    >1.0</bp:stoichiometricCoefficient>
    <bp:physicalEntity>
      <bp:Protein rdf:ID="Protein_27">
        <bp:dataSource rdf:resource="#Provenance_3"/>
        <bp:entityReference rdf:resource="#ATM"/>
        <bp:name rdf:datatype="http://www.w3.org/2001/XMLSchema#string"
        >Ataxia telangiectasia mutated) (A-T, mutated) </bp:name>
        <bp:standardName
rdf:datatype="http://www.w3.org/2001/XMLSchema#string"
        >Serine-protein kinase AT(Ataxia telangiectasia mutated) (A-T,
mutated)</bp:standardName>
        <bp:cellularLocation rdf:resource="#CellularLocationVocabulary_6"/>
        <bp:comment rdf:datatype="http://www.w3.org/2001/XMLSchema#string"
        >"FUNCTION Involved in signal transduction, cell cycle control and DNA
repair. May function as a tumor suppressor. Necessary for activation of ABL1 and
SAPK"</bp:comment>
        <bp:xref rdf:resource="#UnificationXref_28"/>
        <bp:displayName rdf:datatype="http://www.w3.org/2001/XMLSchema#string"
        >ATM</bp:displayName>
      </bp:Protein>
    </bp:physicalEntity>
  </bp:Stoichiometry>
</bp:participantStoichiometry>
<bp:left rdf:resource="#Protein_5"/>
<bp:left>
  <bp:SmallMolecule rdf:ID="SmallMolecule_13">
    <bp:entityReference>
      <bp:SmallMoleculeReference rdf:ID="SmallMoleculeReference_15">
        <bp:displayName rdf:datatype="http://www.w3.org/2001/XMLSchema#string"
        >ATP</bp:displayName>
        <bp:xref>
          <bp:UnificationXref rdf:ID="UnificationXref_14">

```

```

        <bp:id rdf:datatype="http://www.w3.org/2001/XMLSchema#string"
        >CHEBI:2359</bp:id>
        <bp:db rdf:datatype="http://www.w3.org/2001/XMLSchema#string"
        >ChEBI</bp:db>
        </bp:UnificationXref>
        </bp:xref>
        <bp:standardName
rdf:datatype="http://www.w3.org/2001/XMLSchema#string"
        >Adenosine 5'-triphosphate</bp:standardName>
        </bp:SmallMoleculeReference>
        </bp:entityReference>
        <bp:xref rdf:resource="#UnificationXref_14"/>
        <bp:cellularLocation rdf:resource="#CellularLocationVocabulary_6"/>
        <bp:standardName rdf:datatype="http://www.w3.org/2001/XMLSchema#string"
        >Adenosine 5'-triphosphate</bp:standardName>
        <bp:dataSource rdf:resource="#Provenance_3"/>
        <bp:displayName rdf:datatype="http://www.w3.org/2001/XMLSchema#string"
        >ATP</bp:displayName>
        </bp:SmallMolecule>
    </bp:left>
    <bp:participantStoichiometry>
        <bp:Stoichiometry rdf:ID="Stoichiometry_1">
            <bp:physicalEntity rdf:resource="#Protein_5"/>
            <bp:stoichiometricCoefficient
rdf:datatype="http://www.w3.org/2001/XMLSchema#float"
            >1.0</bp:stoichiometricCoefficient>
        </bp:Stoichiometry>
    </bp:participantStoichiometry>
    <bp:xref>
        <bp:UnificationXref rdf:ID="UnificationXref_26">
            <bp:id rdf:datatype="http://www.w3.org/2001/XMLSchema#string"
            >REACT_69891</bp:id>
            <bp:db rdf:datatype="http://www.w3.org/2001/XMLSchema#string"
            >reactome</bp:db>
            <bp:comment rdf:datatype="http://www.w3.org/2001/XMLSchema#string"
            >http://www.reactome.org </bp:comment>
        </bp:UnificationXref>
    </bp:xref>
    <bp:displayName rdf:datatype="http://www.w3.org/2001/XMLSchema#string"
    >Phosphorylation and activation of CHK2 by ATM</bp:displayName>
    <bp:conversionDirection rdf:datatype="http://www.w3.org/2001/XMLSchema#string"
    >LEFT-TO-RIGHT</bp:conversionDirection>
    <bp:dataSource rdf:resource="#Provenance_3"/>
    <bp:participantStoichiometry>
        <bp:Stoichiometry rdf:ID="Stoichiometry_4">
            <bp:stoichiometricCoefficient
rdf:datatype="http://www.w3.org/2001/XMLSchema#float"
            >1.0</bp:stoichiometricCoefficient>
            <bp:physicalEntity rdf:resource="#SmallMolecule_13"/>
        </bp:Stoichiometry>
    </bp:participantStoichiometry>
    <bp:xref>
        <bp:PublicationXref rdf:ID="PublicationXref_25">
            <bp:author rdf:datatype="http://www.w3.org/2001/XMLSchema#string"
            >McGowan, CH </bp:author>
            <bp:author rdf:datatype="http://www.w3.org/2001/XMLSchema#string"
            >Laus, MC </bp:author>
            <bp:author rdf:datatype="http://www.w3.org/2001/XMLSchema#string"
            >Luyten, WH </bp:author>
            <bp:title rdf:datatype="http://www.w3.org/2001/XMLSchema#string"
            >A human homologue of the checkpoint kinase Cds1 directly inhibits Cdc25
phosphatase.</bp:title>
            <bp:source rdf:datatype="http://www.w3.org/2001/XMLSchema#string"
            >Curr Biol 9:1-10 </bp:source>
            <bp:author rdf:datatype="http://www.w3.org/2001/XMLSchema#string"
            >Parker, AE </bp:author>
            <bp:author rdf:datatype="http://www.w3.org/2001/XMLSchema#string"
            >de Weyer, IV </bp:author>
            <bp:author rdf:datatype="http://www.w3.org/2001/XMLSchema#string"
            >Blasina, A </bp:author>
            <bp:id rdf:datatype="http://www.w3.org/2001/XMLSchema#string"
            >9889122</bp:id>

```



```

    <bp:db rdf:datatype="http://www.w3.org/2001/XMLSchema#string"
    >pubmed</bp:db>
    <bp:year rdf:datatype="http://www.w3.org/2001/XMLSchema#int"
    >1999</bp:year>
  </bp:PublicationXref>
</bp:xref>
<bp:participantStoichiometry>
  <bp:Stoichiometry rdf:ID="Stoichiometry_3">
    <bp:physicalEntity rdf:resource="#SmallMolecule_21"/>
    <bp:stoichiometricCoefficient
rdf:datatype="http://www.w3.org/2001/XMLSchema#float"
    >1.0</bp:stoichiometricCoefficient>
  </bp:Stoichiometry>
</bp:participantStoichiometry>
  <bp:spontaneous rdf:datatype="http://www.w3.org/2001/XMLSchema#boolean"
  >>false</bp:spontaneous>
</bp:BiochemicalReaction>
</bp:controlled>
<bp:controlType rdf:datatype="http://www.w3.org/2001/XMLSchema#string"
>ACTIVATION</bp:controlType>
<bp:controller rdf:resource="#Protein_27"/>
<bp:displayName rdf:datatype="http://www.w3.org/2001/XMLSchema#string"
>ATM phosphorylates and activates CHK2</bp:displayName>
<bp:xref rdf:resource="#RelationshipXref_29"/>
<bp:availability rdf:datatype="http://www.w3.org/2001/XMLSchema#string"
>Reactome is a free on-line resource, and Reactome software is open-source.
However, please take note of our disclaimer. (http://reactome.org/disclaimer.html)
</bp:availability>
  <bp:catalysisDirection rdf:datatype="http://www.w3.org/2001/XMLSchema#string"
  >LEFT-TO-RIGHT</bp:catalysisDirection>
</bp:Catalysis>
</rdf:RDF>

```

```

<!-- Created with Protege (with OWL Plugin 3.3.1, Build 430)
http://protege.stanford.edu -->

```

Supplementary Table S3. An example BioPAX file describing the two reactions involved in glucose metabolism in *Escherichia coli*. Data was originally obtained from the EcoCyc database<sup>14</sup>.

```
<?xml version="1.0"?>
<rdf:RDF
  xmlns="http://www.biopax.org/examples/myExample#"
  xmlns:bp="http://www.biopax.org/release/biopax-level3.owl#"
  xmlns:rdf="http://www.w3.org/1999/02/22-rdf-syntax-ns#"
  xmlns:xsd="http://www.w3.org/2001/XMLSchema#"
  xmlns:rdfs="http://www.w3.org/2000/01/rdf-schema#"
  xmlns:owl="http://www.w3.org/2002/07/owl#"
  xmlns:p1="http://www.owl-ontologies.com/assert.owl#"
  xml:base="http://www.biopax.org/examples/myExample">
  <owl:Ontology rdf:about="">
    <owl:imports rdf:resource="http://www.biopax.org/release/biopax-level3.owl"/>
  </owl:Ontology>
  <bp:Protein rdf:ID="Protein_54">
    <bp:standardName rdf:datatype="http://www.w3.org/2001/XMLSchema#string"
    >GLK</bp:standardName>
    <bp:displayName rdf:datatype="http://www.w3.org/2001/XMLSchema#string"
    >glucokinase</bp:displayName>
    <bp:xref>
      <bp:UnificationXref rdf:ID="SwissProtTrEMBL_P46880">
        <bp:id rdf:datatype="http://www.w3.org/2001/XMLSchema#string"
        >P46880</bp:id>
        <bp:comment rdf:datatype="http://www.w3.org/2001/XMLSchema#string"
        >PMID: 15608167</bp:comment>
        <bp:db rdf:datatype="http://www.w3.org/2001/XMLSchema#string"
        >uniprot</bp:db>
      </bp:UnificationXref>
    </bp:xref>
    <bp:entityReference>
      <bp:ProteinReference rdf:ID="ProteinReference_15">
        <bp:sequence rdf:datatype="http://www.w3.org/2001/XMLSchema#string"
        >MTKYALVGDVGGTNRALALCDIASGEISQAKTYSGLDYPSPLEAVIRVYLEEHKVEVKDGCIAIACIPITGDWVAMTNHTWAFSIAE
        MKKNLGFSLHEIINDFTAVSMAIPMLKKEHLIQFGGAEPVEGKPIAVYGAGTGLGVAHLVHVDKRWVSLPGEGGHVDFAPNSEEEA
        IILEILRAEIGHVSAERVLSPGLVNLRYRAIVKADNRLPENLKPDKDITERALADSCDCRRALSLFCVIMGRFGGNLALNLGTFGG
        VFIAGGIVPRFLEFFKASGFRAAFEDKGRFKEYVHDIPVYLIVHDNPGLLGSGAHLRQTLGHIL</bp:sequence>
        <bp:xref rdf:resource="#SwissProtTrEMBL_P46880"/>
        <bp:name rdf:datatype="http://www.w3.org/2001/XMLSchema#string"
        >glucose kinase</bp:name>
        <bp:displayName rdf:datatype="http://www.w3.org/2001/XMLSchema#string"
        >glucokinase</bp:displayName>
        <bp:standardName rdf:datatype="http://www.w3.org/2001/XMLSchema#string"
        >GLK</bp:standardName>
        <bp:organism>
          <bp:BioSource rdf:ID="Escherichia_coli">
            <bp:taxonXref>
              <bp:UnificationXref rdf:ID="taxon_562">
                <bp:id rdf:datatype="http://www.w3.org/2001/XMLSchema#string"
                >562</bp:id>
                <bp:db rdf:datatype="http://www.w3.org/2001/XMLSchema#string"
                >taxonomy</bp:db>
              </bp:UnificationXref>
            </bp:taxonXref>
            <bp:displayName rdf:datatype="http://www.w3.org/2001/XMLSchema#string"
            >Escherichia coli</bp:displayName>
          </bp:BioSource>
        </bp:organism>
      </bp:ProteinReference>
    </bp:entityReference>
    <bp:name rdf:datatype="http://www.w3.org/2001/XMLSchema#string"
    >GLK_ECOLI</bp:name>
    <bp:cellularLocation>
      <bp:CellularLocationVocabulary rdf:ID="cytoplasm">
        <bp:xref>
          <bp:UnificationXref rdf:ID="GO_0005737">
```

```

    <bp:id rdf:datatype="http://www.w3.org/2001/XMLSchema#string"
    >GO:0005737</bp:id>
    <bp:comment rdf:datatype="http://www.w3.org/2001/XMLSchema#string"
    >PMID: 11483584 </bp:comment>
    <bp:db rdf:datatype="http://www.w3.org/2001/XMLSchema#string"
    >Gene Ontology</bp:db>
  </bp:UnificationXref>
</bp:xref>
  <bp:comment rdf:datatype="http://www.w3.org/2001/XMLSchema#string"
  >This example is meant to provide an illustration of how various BioPAX slots
  should be filled; it is not intended to provide useful (or even accurate) biological
  information </bp:comment>
  <bp:term rdf:datatype="http://www.w3.org/2001/XMLSchema#string"
  >cytoplasm</bp:term>
</bp:CellularLocationvocabulary>
</bp:cellularLocation>
<bp:dataSource>
  <bp:Provenance rdf:ID="SwissProtTrEMBL">
    <bp:displayName rdf:datatype="http://www.w3.org/2001/XMLSchema#string"
    >Swiss-Prot/TrEMBL</bp:displayName>
  </bp:Provenance>
</bp:dataSource>
<bp:dataSource>
  <bp:Provenance rdf:ID="aMAZE">
    <bp:displayName rdf:datatype="http://www.w3.org/2001/XMLSchema#string"
    >aMAZE</bp:displayName>
    <bp:comment rdf:datatype="http://www.w3.org/2001/XMLSchema#string"
    ></bp:comment>
  </bp:Provenance>
</bp:dataSource>
</bp:Protein>
<bp:ChemicalStructure rdf:ID="ChemicalStructure_9">
  <bp:comment rdf:datatype="http://www.w3.org/2001/XMLSchema#string"
  ></bp:comment>
  <bp:structureFormat rdf:datatype="http://www.w3.org/2001/XMLSchema#string"
  >SMILES</bp:structureFormat>
  <bp:structureData rdf:datatype="http://www.w3.org/2001/XMLSchema#string"
  >[CH]3(n1(c2(c(nc1)c(N)ncn2))) (O[CH] ([CH] (O) [CH] (O) 3) COP(=O) (O) OP(O) (=O) OP(O) (=O) O)</b
  p:structureData>
  <rdfs:comment rdf:datatype="http://www.w3.org/2001/XMLSchema#string"
  >ATP</rdfs:comment>
</bp:ChemicalStructure>
<bp:Stoichiometry rdf:ID="Stoichiometry_52">
  <bp:stoichiometricCoefficient
  rdf:datatype="http://www.w3.org/2001/XMLSchema#float"
  >1.0</bp:stoichiometricCoefficient>
  <bp:physicalEntity>
    <bp:SmallMolecule rdf:ID="alpha-D-glucose_6-phosphate">
      <bp:dataSource rdf:resource="#aMAZE"/>
      <bp:xref>
        <bp:UnificationXref rdf:ID="KEGG_C00668">
          <bp:comment rdf:datatype="http://www.w3.org/2001/XMLSchema#string"
          >PMID: 9847135</bp:comment>
          <bp:id rdf:datatype="http://www.w3.org/2001/XMLSchema#string"
          >C00668</bp:id>
          <bp:db rdf:datatype="http://www.w3.org/2001/XMLSchema#string"
          >KEGG compound</bp:db>
        </bp:UnificationXref>
      </bp:xref>
      <bp:name rdf:datatype="http://www.w3.org/2001/XMLSchema#string"
      >b-D-glucose-6-phosphate</bp:name>
      <bp:name rdf:datatype="http://www.w3.org/2001/XMLSchema#string"
      >glucose-6-P</bp:name>
      <bp:displayName rdf:datatype="http://www.w3.org/2001/XMLSchema#string"
      >beta-D-glucose 6-phosphate</bp:displayName>
      <bp:entityReference>
        <bp:SmallMoleculeReference rdf:ID="SmallMoleculeReference_13">
          <bp:molecularWeight rdf:datatype="http://www.w3.org/2001/XMLSchema#float"
          >260.14</bp:molecularWeight>
          <bp:chemicalFormula rdf:datatype="http://www.w3.org/2001/XMLSchema#string"
          >C6H13O9P</bp:chemicalFormula>
        </bp:SmallMoleculeReference>
      </bp:entityReference>
    </bp:SmallMolecule>
  </bp:physicalEntity>
</bp:Stoichiometry>

```

```

    <bp:structure>
      <bp:ChemicalStructure rdf:ID="ChemicalStructure_7">
        <bp:structureData
rdf:datatype="http://www.w3.org/2001/XMLSchema#string"
          >C(OP(=O)(O)O)[CH]1([CH](O)[CH](O)[CH](O)[CH](O)O1)</bp:structureData>
          <rdfs:comment rdf:datatype="http://www.w3.org/2001/XMLSchema#string"
          >beta-glucose-6-phosphate</rdfs:comment>
        <bp:structureFormat
rdf:datatype="http://www.w3.org/2001/XMLSchema#string"
          >SMILES</bp:structureFormat>
        </bp:ChemicalStructure>
      </bp:structure>
      <bp:displayName rdf:datatype="http://www.w3.org/2001/XMLSchema#string"
      >beta-D-glucose 6-phosphate</bp:displayName>
      <bp:standardName rdf:datatype="http://www.w3.org/2001/XMLSchema#string"
      >b-D-glu-6-p</bp:standardName>
      <bp:xref rdf:resource="#KEGG_C00668"/>
    </bp:SmallMoleculeReference>
  </bp:entityReference>
  <bp:name rdf:datatype="http://www.w3.org/2001/XMLSchema#string"
  >D-glucose-6-P</bp:name>
  <bp:cellularLocation rdf:resource="#cytoplasm"/>
  <bp:dataSource>
    <bp:Provenance rdf:ID="KEGG">
      <bp:standardName rdf:datatype="http://www.w3.org/2001/XMLSchema#string"
      >Kyoto Encyclopedia of Genes and Genomes</bp:standardName>
      <bp:displayName rdf:datatype="http://www.w3.org/2001/XMLSchema#string"
      >KEGG</bp:displayName>
      <bp:comment rdf:datatype="http://www.w3.org/2001/XMLSchema#string"
      ></bp:comment>
    </bp:Provenance>
  </bp:dataSource>
  <bp:standardName rdf:datatype="http://www.w3.org/2001/XMLSchema#string"
  >a-D-glu-6-p</bp:standardName>
  <bp:name rdf:datatype="http://www.w3.org/2001/XMLSchema#string"
  >beeta-D-glucose-6-p</bp:name>
  </bp:SmallMolecule>
  </bp:physicalEntity>
  </bp:Stoichiometry>
  <bp:UnificationXref rdf:ID="KEGG_R01786">
    <bp:db rdf:datatype="http://www.w3.org/2001/XMLSchema#string"
    >kegg reaction</bp:db>
    <bp:comment rdf:datatype="http://www.w3.org/2001/XMLSchema#string"
    >PMID: 9847135 </bp:comment>
    <bp:id rdf:datatype="http://www.w3.org/2001/XMLSchema#string"
    >R01786</bp:id>
  </bp:UnificationXref>
  <bp:BiochemicalReaction rdf:ID="phosphoglucoisomerase">
    <bp:eCNumber rdf:datatype="http://www.w3.org/2001/XMLSchema#string"
    >5.3.1.9 </bp:eCNumber>
    <bp:participantStoichiometry>
      <bp:Stoichiometry rdf:ID="Stoichiometry_57">
        <bp:stoichiometricCoefficient
rdf:datatype="http://www.w3.org/2001/XMLSchema#float"
          >1.0</bp:stoichiometricCoefficient>
        <bp:physicalEntity>
          <bp:SmallMolecule rdf:ID="beta-D-fructose_6-phosphate">
            <bp:name rdf:datatype="http://www.w3.org/2001/XMLSchema#string"
            >&lt;FONT FACE="Symbol"&gt;b&lt;/FONT&gt;-D-fructose-6-phosphate
          </bp:name>
          <bp:entityReference>
            <bp:SmallMoleculeReference rdf:ID="SmallMoleculeReference_14">
              <bp:structure>
                <bp:ChemicalStructure rdf:ID="ChemicalStructure_8">
                  <bp:structureData
rdf:datatype="http://www.w3.org/2001/XMLSchema#string"
                    >C(OP(O)(O)=O)[CH]1([CH](O)[CH](O)C(O)(O1)CO)</bp:structureData>
                    <rdfs:comment
rdf:datatype="http://www.w3.org/2001/XMLSchema#string"
                    >beta-fructose-6-phosphate</rdfs:comment>
                  <bp:structureFormat
rdf:datatype="http://www.w3.org/2001/XMLSchema#string"
                    >
                </bp:ChemicalStructure>
              </bp:structure>
            </bp:SmallMoleculeReference>
          </bp:entityReference>
        </bp:physicalEntity>
      </bp:Stoichiometry>
    </bp:participantStoichiometry>
  </bp:BiochemicalReaction>

```

```

        >SMILES</bp:structureFormat>
    </bp:ChemicalStructure>
</bp:structure>
<bp:displayName rdf:datatype="http://www.w3.org/2001/XMLSchema#string"
>beta-D-fructose 6-phosphate</bp:displayName>
<bp:molecularWeight
rdf:datatype="http://www.w3.org/2001/XMLSchema#float"
>260.14</bp:molecularWeight>
<bp:chemicalFormula
rdf:datatype="http://www.w3.org/2001/XMLSchema#string"
>C6H13O9P</bp:chemicalFormula>
<bp:standardName
rdf:datatype="http://www.w3.org/2001/XMLSchema#string"
>b-D-fru-6-p</bp:standardName>
<bp:xref>
  <bp:UnificationXref rdf:ID="KEGG_C05345">
    <bp:comment rdf:datatype="http://www.w3.org/2001/XMLSchema#string"
    >PMID: 9847135 </bp:comment>
    <bp:id rdf:datatype="http://www.w3.org/2001/XMLSchema#string"
    >C05345</bp:id>
    <bp:db rdf:datatype="http://www.w3.org/2001/XMLSchema#string"
    >kegg compound</bp:db>
  </bp:UnificationXref>
</bp:xref>
</bp:SmallMoleculeReference>
</bp:entityReference>
<bp:dataSource rdf:resource="#aMAZE"/>
<bp:dataSource rdf:resource="#KEGG"/>
<bp:xref rdf:resource="#KEGG_C05345"/>
<bp:standardName rdf:datatype="http://www.w3.org/2001/XMLSchema#string"
>b-D-fru-6-p</bp:standardName>
<bp:displayName rdf:datatype="http://www.w3.org/2001/XMLSchema#string"
>beta-D-fructose 6-phosphate</bp:displayName>
<bp:cellularLocation rdf:resource="#cytoplasm"/>
</bp:SmallMolecule>
</bp:physicalEntity>
</bp:Stoichiometry>
</bp:participantStoichiometry>
<bp:conversionDirection rdf:datatype="http://www.w3.org/2001/XMLSchema#string"
>REVERSIBLE</bp:conversionDirection>
<bp:displayName rdf:datatype="http://www.w3.org/2001/XMLSchema#string"
>beta-D-glu-6-p &lt;=> beta-D-fru-6-p</bp:displayName>
<bp:dataSource rdf:resource="#aMAZE"/>
<bp:left rdf:resource="#alpha-D-glucose_6-phosphate"/>
<bp:xref>
  <bp:UnificationXref rdf:ID="KEGG_R02740">
    <bp:db rdf:datatype="http://www.w3.org/2001/XMLSchema#string"
    >kegg reaction</bp:db>
    <bp:id rdf:datatype="http://www.w3.org/2001/XMLSchema#string"
    >R02740</bp:id>
    <bp:comment rdf:datatype="http://www.w3.org/2001/XMLSchema#string"
    >PMID: 9847135 </bp:comment>
  </bp:UnificationXref>
</bp:xref>
<bp:name rdf:datatype="http://www.w3.org/2001/XMLSchema#string"
>beta-D-Glucose 6-phosphate => beta-D-Fructose 6-phosphate</bp:name>
<bp:dataSource rdf:resource="#KEGG"/>
<bp:standardName rdf:datatype="http://www.w3.org/2001/XMLSchema#string"
>b-D-glu-6-p &lt;=> b-D-fru-6-p</bp:standardName>
<bp:right rdf:resource="#beta-D-fructose_6-phosphate"/>
<bp:deltaG>
  <bp:DeltaG rdf:ID="DeltaG_12">
    <bp:deltaGPrime0 rdf:datatype="http://www.w3.org/2001/XMLSchema#float"
    >0.4</bp:deltaGPrime0>
  </bp:DeltaG>
</bp:deltaG>
<bp:name rdf:datatype="http://www.w3.org/2001/XMLSchema#string"
>beta-D-Glucose 6-phosphate ketol-isomerase</bp:name>
<bp:participantStoichiometry>
  <bp:Stoichiometry rdf:ID="Stoichiometry_58">
    <bp:physicalEntity rdf:resource="#alpha-D-glucose_6-phosphate"/>

```

```

    <bp:stoichiometricCoefficient
rdf:datatype="http://www.w3.org/2001/XMLSchema#float"
    >1.0</bp:stoichiometricCoefficient>
    </bp:Stoichiometry>
  </bp:participantStoichiometry>
</bp:BiochemicalReaction>
<bp:SmallMoleculeReference rdf:ID="SmallMoleculeReference_10">
  <bp:structure>
    <bp:ChemicalStructure rdf:ID="ChemicalStructure_6">
      <bp:structureFormat rdf:datatype="http://www.w3.org/2001/XMLSchema#string"
      >SMILES</bp:structureFormat>
      <bp:structureData rdf:datatype="http://www.w3.org/2001/XMLSchema#string"
      >c12(n(cnc(c(N)ncn1)2)[CH]3(O[CH]([CH](O)[CH](O)3)COP(=O)(O)OP(O)(=O)O)</bp:structure
Data>
      <rdfs:comment rdf:datatype="http://www.w3.org/2001/XMLSchema#string"
      >ADP</rdfs:comment>
    </bp:ChemicalStructure>
  </bp:structure>
  <bp:xref>
    <bp:UnificationXref rdf:ID="KEGG_C00008">
      <bp:id rdf:datatype="http://www.w3.org/2001/XMLSchema#string"
      >C00008</bp:id>
      <bp:comment rdf:datatype="http://www.w3.org/2001/XMLSchema#string"
      >PMID: 9847135 </bp:comment>
      <bp:db rdf:datatype="http://www.w3.org/2001/XMLSchema#string"
      >kegg compound</bp:db>
    </bp:UnificationXref>
  </bp:xref>
  <bp:name rdf:datatype="http://www.w3.org/2001/XMLSchema#string"
  >adenosine diphosphate</bp:name>
  <bp:chemicalFormula rdf:datatype="http://www.w3.org/2001/XMLSchema#string"
  >C10H15N5O10P2</bp:chemicalFormula>
  <bp:standardName rdf:datatype="http://www.w3.org/2001/XMLSchema#string"
  >ADP</bp:standardName>
  <bp:molecularWeight rdf:datatype="http://www.w3.org/2001/XMLSchema#float"
  >427.2</bp:molecularWeight>
  <bp:displayName rdf:datatype="http://www.w3.org/2001/XMLSchema#string"
  >Adenosine 5'-diphosphate</bp:displayName>
</bp:SmallMoleculeReference>
<bp:PublicationXref rdf:ID="PublicationXref49">
  <bp:id rdf:datatype="http://www.w3.org/2001/XMLSchema#string"
  >2549346</bp:id>
  <bp:db rdf:datatype="http://www.w3.org/2001/XMLSchema#string"
  >PubMed</bp:db>
</bp:PublicationXref>
<bp:UnificationXref rdf:ID="Swiss-ProtTREMBL_Q9KH85">
  <bp:comment rdf:datatype="http://www.w3.org/2001/XMLSchema#string"
  > PMID: 15608167</bp:comment>
  <bp:id rdf:datatype="http://www.w3.org/2001/XMLSchema#string"
  >Q9KH85</bp:id>
  <bp:db rdf:datatype="http://www.w3.org/2001/XMLSchema#string"
  >UniProt</bp:db>
</bp:UnificationXref>
<bp:SmallMoleculeReference rdf:ID="SmallMoleculeReference_11">
  <bp:structure rdf:resource="#ChemicalStructure_9"/>
  <bp:name rdf:datatype="http://www.w3.org/2001/XMLSchema#string"
  >adenosine triphosphate</bp:name>
  <bp:molecularWeight rdf:datatype="http://www.w3.org/2001/XMLSchema#float"
  >507.18</bp:molecularWeight>
  <bp:chemicalFormula rdf:datatype="http://www.w3.org/2001/XMLSchema#string"
  >C10H16N5O13P3</bp:chemicalFormula>
  <bp:standardName rdf:datatype="http://www.w3.org/2001/XMLSchema#string"
  >ATP</bp:standardName>
  <bp:xref>
    <bp:UnificationXref rdf:ID="KEGG_C00002">
      <bp:id rdf:datatype="http://www.w3.org/2001/XMLSchema#string"
      >C00002</bp:id>
      <bp:db rdf:datatype="http://www.w3.org/2001/XMLSchema#string"
      >kegg compound</bp:db>
      <bp:comment rdf:datatype="http://www.w3.org/2001/XMLSchema#string"
      >PMID: 9847135 </bp:comment>
    </bp:UnificationXref>
  </bp:xref>

```

```

    </bp:UnificationXref>
  </bp:xref>
  <bp:displayName rdf:datatype="http://www.w3.org/2001/XMLSchema#string"
  >Adenosine 5'-triphosphate</bp:displayName>
</bp:SmallMoleculeReference>
<bp:SmallMolecule rdf:ID="ADP">
  <bp:displayName rdf:datatype="http://www.w3.org/2001/XMLSchema#string"
  >Adenosine 5'-diphosphate</bp:displayName>
  <bp:standardName rdf:datatype="http://www.w3.org/2001/XMLSchema#string"
  >ADP</bp:standardName>
  <bp:name rdf:datatype="http://www.w3.org/2001/XMLSchema#string"
  >adenosine diphosphate</bp:name>
  <bp:dataSource rdf:resource="#KEGG"/>
  <bp:entityReference rdf:resource="#SmallMoleculeReference_10"/>
  <bp:cellularLocation rdf:resource="#cytoplasm"/>
  <bp:dataSource rdf:resource="#aMAZE"/>
  <bp:xref rdf:resource="#KEGG_C00008"/>
  <bp:availability rdf:datatype="http://www.w3.org/2001/XMLSchema#string"
  ></bp:availability>
</bp:SmallMolecule>
<bp:BiochemicalPathwayStep rdf:ID="BiochemicalPathwayStep_3">
  <bp:stepDirection rdf:datatype="http://www.w3.org/2001/XMLSchema#string"
  >LEFT-TO-RIGHT</bp:stepDirection>
  <bp:stepConversion rdf:resource="#phosphoglucosomerase"/>
  <bp:stepProcess>
    <bp:Catalysis rdf:ID="phosphoglucose_isomerase_converts_alpha-D-gluc-6-
    p_to_beta-D-fruc-6-p">
      <bp:controller>
        <bp:Protein rdf:ID="phosphoglucose_isomerase">
          <bp:xref rdf:resource="#Swiss-ProtTrEMBL_Q9KH85"/>
          <bp:name rdf:datatype="http://www.w3.org/2001/XMLSchema#string"
          >glucose-6-phosphate isomerase</bp:name>
          <bp:entityReference>
            <bp:ProteinReference rdf:ID="ProteinReference_16">
              <bp:comment rdf:datatype="http://www.w3.org/2001/XMLSchema#string"
              >This example is meant to provide an illustration of how various
              BiOPAX slots should be filled; it is not intended to provide useful (or even accurate)
              biological information </bp:comment>
              <bp:name rdf:datatype="http://www.w3.org/2001/XMLSchema#string"
              >PHI</bp:name>
              <bp:sequence rdf:datatype="http://www.w3.org/2001/XMLSchema#string"
              >KTFSEAIISGEWKGYTGKAITDVVNIGIGGSDLGPYMVTEALRPYKHNLMHFVSNVDGTHIAEVLKKNVPETTLFLVASKTFTT
              QETMTNAHSARDWFLKAAGDEKHKVAKHFAALSTNAKAVGEFGIDTANMFEFWDWVGGRYSLWSAIGLSIVLSIGFDNFVELLSGAH
              AMDKHFSTTPAEKNLVLALLIGIWNFFGAETEAILPYDQYMHRFAAYFQQGNMESNGKYVDRNGNVVDYQTGPIIWGEPGNTG
              QHAFYQLIHQGTKMVPDCAFIAPAITHNPLFDHHQKLLSKFFAQTEALAFGKSREVVEQEYRDQGD PAT</bp:sequence>
              <bp:xref rdf:resource="#Swiss-ProtTrEMBL_Q9KH85"/>
              <bp:standardName
              rdf:datatype="http://www.w3.org/2001/XMLSchema#string"
              >PGI</bp:standardName>
              <bp:name rdf:datatype="http://www.w3.org/2001/XMLSchema#string"
              >phosphohexose isomerase</bp:name>
              <bp:displayName rdf:datatype="http://www.w3.org/2001/XMLSchema#string"
              >phosphoglucose isomerase</bp:displayName>
              <bp:name rdf:datatype="http://www.w3.org/2001/XMLSchema#string"
              >glucose-6-phosphate isomerase</bp:name>
              <bp:organism rdf:resource="#Escherichia_coli"/>
              <bp:name rdf:datatype="http://www.w3.org/2001/XMLSchema#string"
              >GPI</bp:name>
            </bp:ProteinReference>
          </bp:entityReference>
          <bp:cellularLocation rdf:resource="#cytoplasm"/>
          <bp:dataSource rdf:resource="#KEGG"/>
          <bp:name rdf:datatype="http://www.w3.org/2001/XMLSchema#string"
          >PHI</bp:name>
          <bp:dataSource rdf:resource="#aMAZE"/>
          <bp:displayName rdf:datatype="http://www.w3.org/2001/XMLSchema#string"
          >phosphoglucose isomerase</bp:displayName>
          <bp:name rdf:datatype="http://www.w3.org/2001/XMLSchema#string"
          >phosphohexose isomerase</bp:name>
          <bp:standardName rdf:datatype="http://www.w3.org/2001/XMLSchema#string"
          >PGI</bp:standardName>

```

```

    <bp:name rdf:datatype="http://www.w3.org/2001/XMLSchema#string"
    >GPI</bp:name>
  </bp:Protein>
</bp:controller>
<bp:displayName rdf:datatype="http://www.w3.org/2001/XMLSchema#string"
>catalysis of (beta-D-glu-6-p &lt;=&gt; beta-D-fruc-6-p)</bp:displayName>
<bp:catalysisDirection rdf:datatype="http://www.w3.org/2001/XMLSchema#string"
>LEFT-TO-RIGHT</bp:catalysisDirection>
<bp:controlled rdf:resource="#phosphoglucoisomerase"/>
<bp:dataSource rdf:resource="#KEGG"/>
<bp:standardName rdf:datatype="http://www.w3.org/2001/XMLSchema#string"
>PGI -&gt; (b-d-glu-6-p &lt;=&gt; b-D-fru-6p)</bp:standardName>
<bp:dataSource rdf:resource="#aMAZE"/>
<bp:comment rdf:datatype="http://www.w3.org/2001/XMLSchema#string"
>The source of this data did not store catalyses of reactions as separate
objects, so there are no unification x-refs pointing to the source of these BioPAX
instances. </bp:comment>
<bp:availability rdf:datatype="http://www.w3.org/2001/XMLSchema#string"
></bp:availability>
<bp:controlType rdf:datatype="http://www.w3.org/2001/XMLSchema#string"
>ACTIVATION</bp:controlType>
</bp:Catalysis>
</bp:stepProcess>
</bp:BiochemicalPathwayStep>
<bp:Stoichiometry rdf:ID="Stoichiometry_37">
  <bp:stoichiometricCoefficient
rdf:datatype="http://www.w3.org/2001/XMLSchema#float"
>1.0</bp:stoichiometricCoefficient>
  <bp:physicalEntity>
    <bp:SmallMolecule rdf:ID="alpha-D-glucose">
      <bp:xref>
        <bp:UnificationXref rdf:ID="KEGG_C00267">
          <bp:db rdf:datatype="http://www.w3.org/2001/XMLSchema#string"
          >kegg compound</bp:db>
          <bp:id rdf:datatype="http://www.w3.org/2001/XMLSchema#string"
          >C00267</bp:id>
          <bp:comment rdf:datatype="http://www.w3.org/2001/XMLSchema#string"
          >PMID: 9847135 </bp:comment>
        </bp:UnificationXref>
      </bp:xref>
      <bp:displayName rdf:datatype="http://www.w3.org/2001/XMLSchema#string"
      >beta-D-glucose</bp:displayName>
      <bp:dataSource rdf:resource="#aMAZE"/>
      <bp:dataSource rdf:resource="#KEGG"/>
      <bp:cellularLocation rdf:resource="#cytoplasm"/>
      <bp:standardName rdf:datatype="http://www.w3.org/2001/XMLSchema#string"
      >b-D-glu</bp:standardName>
      <bp:name rdf:datatype="http://www.w3.org/2001/XMLSchema#string"
      >&lt;FONT FACE="Symbol"&gt;&lt;/FONT&gt;-D-glucose </bp:name>
      <bp:entityReference>
        <bp:SmallMoleculeReference rdf:ID="SmallMoleculeReference_12">
          <bp:standardName rdf:datatype="http://www.w3.org/2001/XMLSchema#string"
          >b-D-glu</bp:standardName>
          <bp:structure>
            <bp:ChemicalStructure rdf:ID="ChemicalStructure_5">
              <rdfs:comment rdf:datatype="http://www.w3.org/2001/XMLSchema#string"
              >alpha-D-glucose</rdfs:comment>
              <bp:structureData
rdf:datatype="http://www.w3.org/2001/XMLSchema#string"
              >C1(C(O)C(O)C(O)C(O1)CO)(O)</bp:structureData>
              <bp:structureFormat
rdf:datatype="http://www.w3.org/2001/XMLSchema#string"
              >SMILES</bp:structureFormat>
            </bp:ChemicalStructure>
          </bp:structure>
          <bp:xref rdf:resource="#KEGG_C00267"/>
          <bp:displayName rdf:datatype="http://www.w3.org/2001/XMLSchema#string"
          >beta-D-glucose</bp:displayName>
          <bp:chemicalFormula rdf:datatype="http://www.w3.org/2001/XMLSchema#string"
          >C6H12O6</bp:chemicalFormula>
          <bp:molecularWeight rdf:datatype="http://www.w3.org/2001/XMLSchema#float"
          >180.16</bp:molecularWeight>
        </bp:SmallMoleculeReference>
      </bp:entityReference>
    </bp:SmallMolecule>
  </bp:physicalEntity>

```



```

        </bp:SmallMoleculeReference>
    </bp:entityReference>
</bp:SmallMolecule>
</bp:physicalEntity>
</bp:Stoichiometry>
<bp:Stoichiometry rdf:ID="Stoichiometry_43">
    <bp:physicalEntity>
        <bp:SmallMolecule rdf:ID="ATP">
            <bp:xref rdf:resource="#KEGG_C00002"/>
            <bp:dataSource rdf:resource="#KEGG"/>
            <bp:dataSource rdf:resource="#aMAZE"/>
            <bp:standardName rdf:datatype="http://www.w3.org/2001/XMLSchema#string"
            >ATP</bp:standardName>
            <bp:displayName rdf:datatype="http://www.w3.org/2001/XMLSchema#string"
            >Adenosine 5'-triphosphate</bp:displayName>
            <bp:entityReference rdf:resource="#SmallMoleculeReference_11"/>
            <bp:name rdf:datatype="http://www.w3.org/2001/XMLSchema#string"
            >adenosine triphosphate</bp:name>
            <bp:cellularLocation rdf:resource="#cytoplasm"/>
        </bp:SmallMolecule>
    </bp:physicalEntity>
    <bp:stoichiometricCoefficient
    rdf:datatype="http://www.w3.org/2001/XMLSchema#float"
    >1.0</bp:stoichiometricCoefficient>
</bp:Stoichiometry>
<bp:BiochemicalReaction rdf:ID="glucokinase">
    <bp:xref rdf:resource="#KEGG_R01786"/>
    <bp:name rdf:datatype="http://www.w3.org/2001/XMLSchema#string"
    >glucose ATP phosphotransferase </bp:name>
    <bp:displayName rdf:datatype="http://www.w3.org/2001/XMLSchema#string"
    >beta-D-glu + ATP =&gt; beta-D-glu-6-p + ADP</bp:displayName>
    <bp:dataSource rdf:resource="#KEGG"/>
    <bp:conversionDirection rdf:datatype="http://www.w3.org/2001/XMLSchema#string"
    >REVERSIBLE</bp:conversionDirection>
    <bp:participantStoichiometry rdf:resource="#Stoichiometry_43"/>
    <bp:participantStoichiometry rdf:resource="#Stoichiometry_37"/>
    <bp:left rdf:resource="#ATP"/>
    <bp:participantStoichiometry rdf:resource="#Stoichiometry_52"/>
    <bp:right rdf:resource="#ADP"/>
    <bp:eCNumber rdf:datatype="http://www.w3.org/2001/XMLSchema#string"
    >2.7.1.1 </bp:eCNumber>
    <bp:left rdf:resource="#alpha-D-glucose"/>
    <bp:dataSource rdf:resource="#aMAZE"/>
    <bp:spontaneous rdf:datatype="http://www.w3.org/2001/XMLSchema#boolean"
    >true</bp:spontaneous>
    <bp:right rdf:resource="#alpha-D-glucose_6-phosphate"/>
    <bp:eCNumber rdf:datatype="http://www.w3.org/2001/XMLSchema#string"
    >2.7.1.2 </bp:eCNumber>
    <bp:name rdf:datatype="http://www.w3.org/2001/XMLSchema#string"
    >ATP:D-glucose 6-phosphotransferase </bp:name>
    <bp:participantStoichiometry>
        <bp:Stoichiometry rdf:ID="Stoichiometry_49">
            <bp:stoichiometricCoefficient
            rdf:datatype="http://www.w3.org/2001/XMLSchema#float"
            >1.0</bp:stoichiometricCoefficient>
            <bp:physicalEntity rdf:resource="#ADP"/>
        </bp:Stoichiometry>
    </bp:participantStoichiometry>
    <bp:standardName rdf:datatype="http://www.w3.org/2001/XMLSchema#string"
    >b-D-glu =&gt; b-D-glu-6-p</bp:standardName>
</bp:BiochemicalReaction>
<bp:Pathway rdf:ID="Pathway50">
    <bp:name rdf:datatype="http://www.w3.org/2001/XMLSchema#string"
    >glucose degradation</bp:name>
    <bp:pathwayOrder rdf:resource="#BiochemicalPathwayStep_3"/>
    <bp:standardName rdf:datatype="http://www.w3.org/2001/XMLSchema#string"
    >glycolysis</bp:standardName>
    <bp:comment rdf:datatype="http://www.w3.org/2001/XMLSchema#string"
    >This example is meant to provide an illustration of how various BioPAX slots
    should be filled; it is not intended to provide useful (or even accurate) biological
    information </bp:comment>
    <bp:displayName rdf:datatype="http://www.w3.org/2001/XMLSchema#string"

```

```

>Glycolysis Pathway</bp:displayName>
<bp:availability rdf:datatype="http://www.w3.org/2001/XMLSchema#string"
>see http://www.amaze.ulb.ac.be/</bp:availability>
<bp:organism rdf:resource="#Escherichia_coli"/>
<bp:availability rdf:datatype="http://www.w3.org/2001/XMLSchema#string"
>All data within the pathway has the same availability</bp:availability>
<bp:pathwayComponent rdf:resource="#phosphoglucose_isomerase_converts_alpha-D-
gluc-6-p_to_beta-D-fruc-6-p"/>
<bp:pathwayComponent>
  <bp:Catalysis rdf:ID="glucokinase_converts_alpha-D-glu_to_alpha-D-glu-6-p">
    <bp:controlType rdf:datatype="http://www.w3.org/2001/XMLSchema#string"
    >ACTIVATION</bp:controlType>
    <bp:displayName rdf:datatype="http://www.w3.org/2001/XMLSchema#string"
    >catalysis of (alpha-D-glu &lt;=&gt; alpha-D-glu-6-p)</bp:displayName>
    <bp:dataSource rdf:resource="#aMAZE"/>
    <bp:dataSource rdf:resource="#KEGG"/>
    <bp:controlled rdf:resource="#glucokinase"/>
    <bp:comment rdf:datatype="http://www.w3.org/2001/XMLSchema#string"
    >The source of this data did not store catalyses of reactions as separate
objects, so there are no unification x-refs pointing to the source of these BioPAX
instances. </bp:comment>
    <bp:controller rdf:resource="#Protein_54"/>
    <bp:standardName rdf:datatype="http://www.w3.org/2001/XMLSchema#string"
    >GLK -&gt; (a-D-glu &lt;=&gt; a-D-glu-6-p)</bp:standardName>
    <bp:catalysisDirection rdf:datatype="http://www.w3.org/2001/XMLSchema#string"
    >LEFT-TO-RIGHT</bp:catalysisDirection>
  </bp:Catalysis>
</bp:pathwayComponent>
<bp:pathwayComponent rdf:resource="#phosphoglucoisomerase"/>
<bp:comment rdf:datatype="http://www.w3.org/2001/XMLSchema#string"
></bp:comment>
<bp:pathwayComponent rdf:resource="#glucokinase"/>
<bp:name rdf:datatype="http://www.w3.org/2001/XMLSchema#string"
>Embden-Meyerhof pathway</bp:name>
<bp:xref rdf:resource="#PublicationXref49"/>
<bp:dataSource rdf:resource="#KEGG"/>
<bp:dataSource rdf:resource="#aMAZE"/>
<bp:pathwayOrder>
  <bp:BiochemicalPathwayStep rdf:ID="BiochemicalPathwayStep_2">
    <bp:stepConversion rdf:resource="#glucokinase"/>
    <bp:nextStep rdf:resource="#BiochemicalPathwayStep_3"/>
    <bp:stepDirection rdf:datatype="http://www.w3.org/2001/XMLSchema#string"
    >LEFT-TO-RIGHT</bp:stepDirection>
    <bp:stepProcess rdf:resource="#glucokinase_converts_alpha-D-glu_to_alpha-D-
glu-6-p"/>
  </bp:BiochemicalPathwayStep>
</bp:pathwayOrder>
</bp:Pathway>
</rdf:RDF>

```

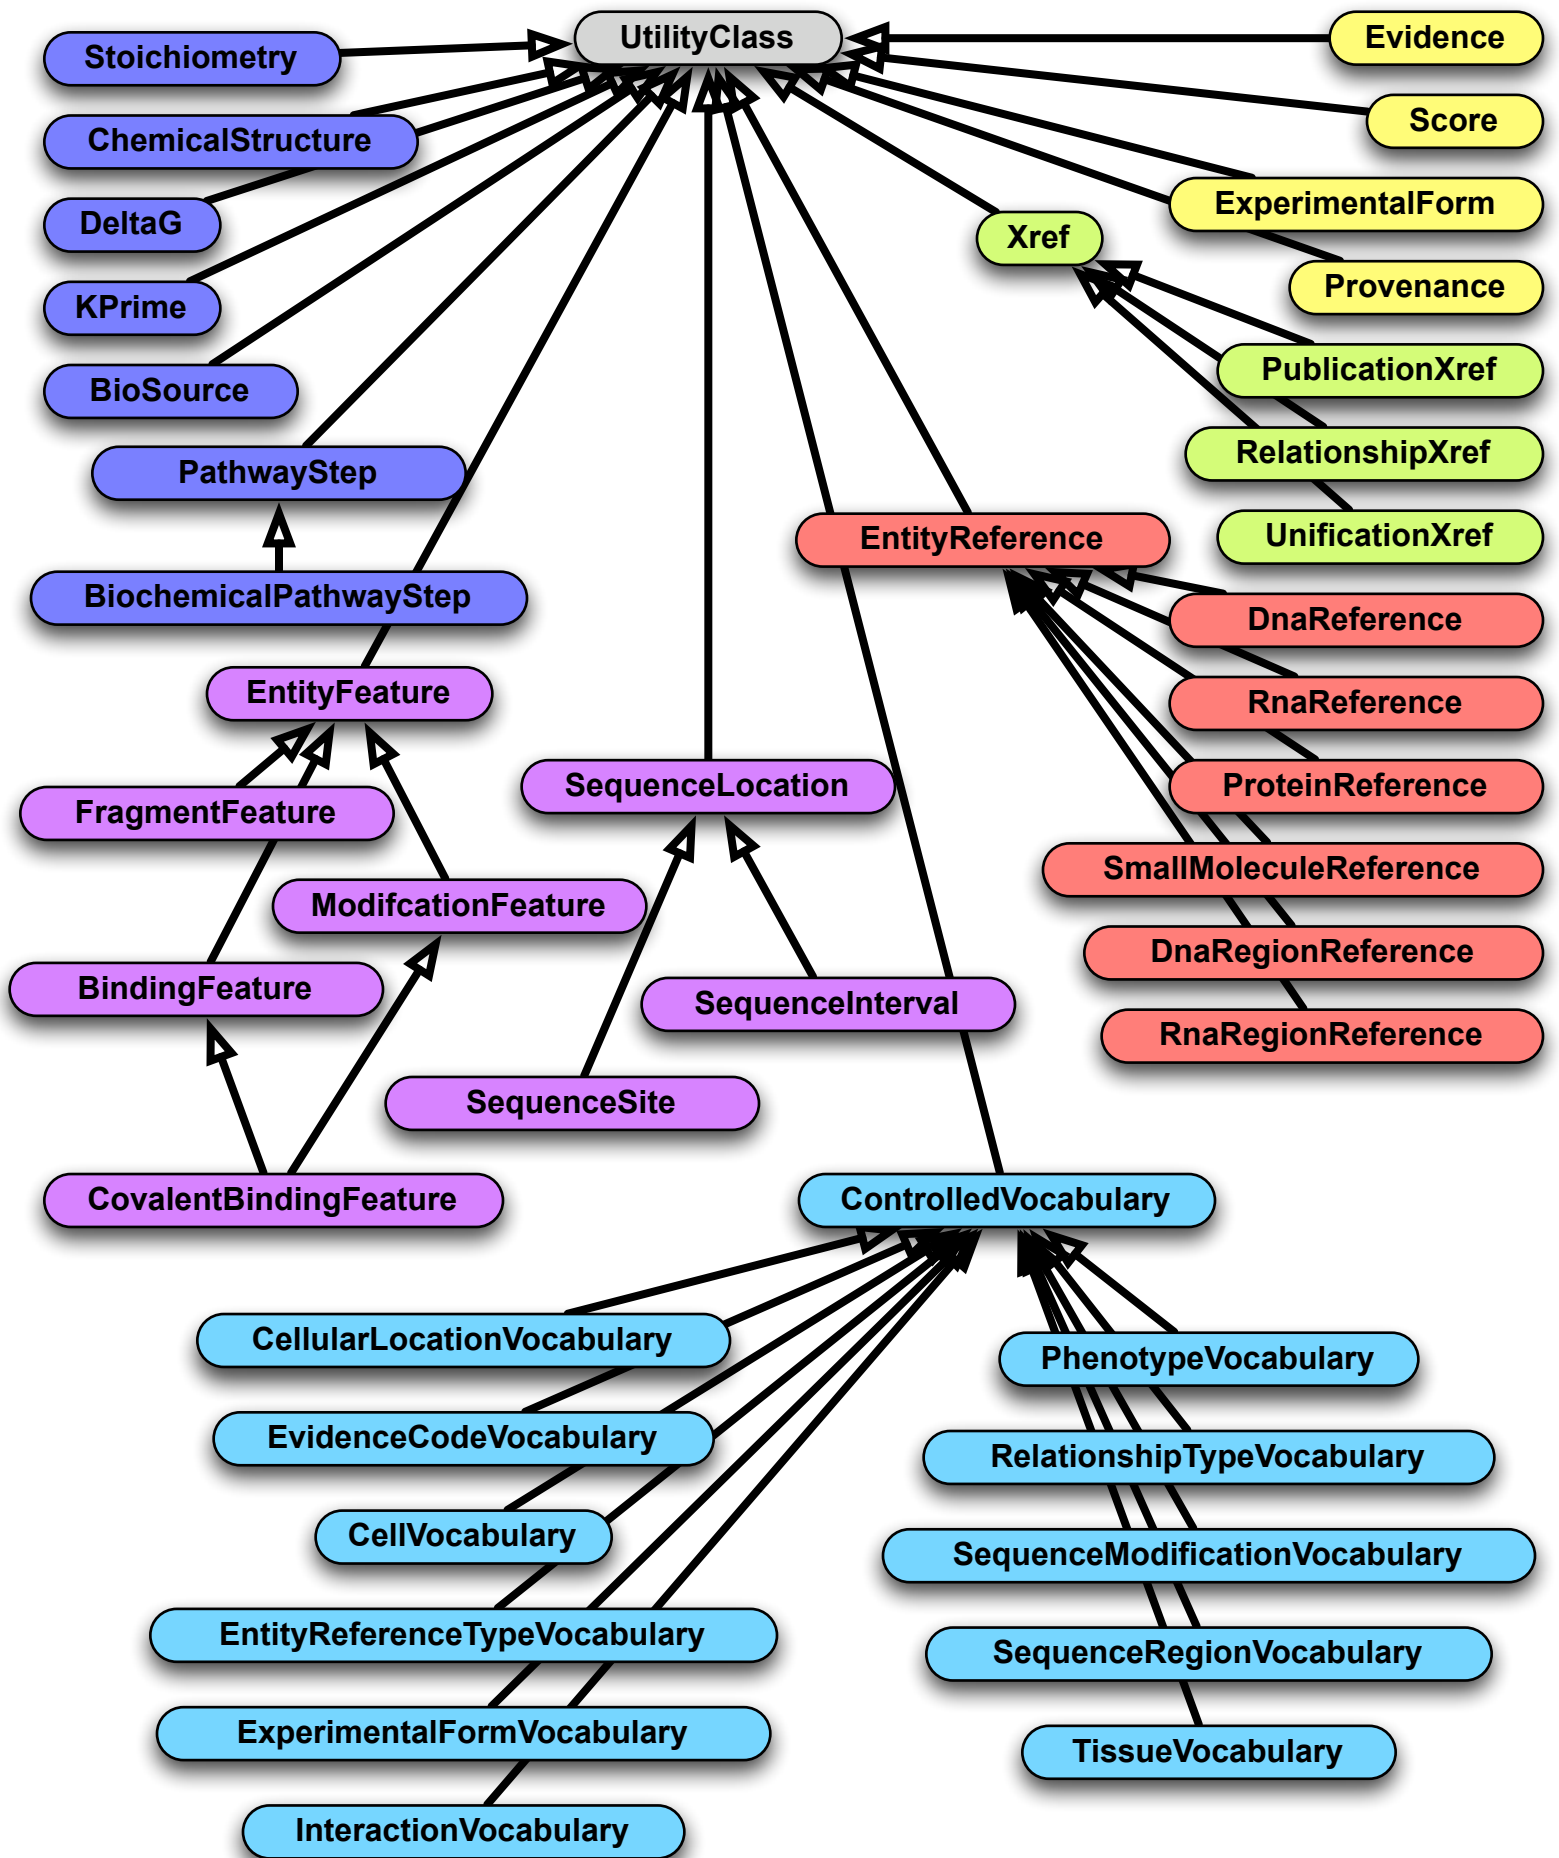

Supplement: NIHMS216985-supplement-1.pdf [file NIHMS216985-supplement-1.pdf]
